# Supplementary material
Source: publisher figshare collection journal article supplement (https://karger.figshare.com/ndownloader/files/28689087)
Supplement: Supplementary file 1 [file 28689087]

## Sheet: Data_S3_MAGs_summary
Data_S3_Culture BP: summary of all the metagome assembled genomes (MAGs)
						BUSCO (compared to bacteria)			QUAST
MAG name	Taxonomy (Blastp against refseq_protein with first 3 BUSCOS)	IMG ID	MAG name in IMG	MAG name in NCBI	BioSample	Estimated completeness (%)	Estimated contamination (%)	%Missing	# contigs	Largest contig	Total length	GC (%)	N50	N75	L50	L75	Sequencing depth
MEGAHIT-QMFCE002AF.10.fa	Noviherbaspirillum autotrophicum	2831285802	Noviherbaspirillum sp. BP10	Noviherbaspirillum sp. BP10	SAMN18740529	90.5	2	8.1	41	621421	5429401	59.52	231078	134435	8	16	1505.69
MEGAHIT-QMFCE002AF.6.fa	Gallionella capsiferriformans	2831290873	Gallionellaceae bacterium BP06	Gallionellaceae bacterium BP06	SAMN18740528	93.2	0	6.8	42	241555	2408093	59.05	97070	60187	8	17	6756.88
MEGAHIT-QMFCE002AF.1.fa	Thiobacillus thioparus	2840071692	Thiobacillus sp. BP01	Thiobacillus sp. BP01	SAMN18740530	90.6	1.4	9.4	15	926960	3249831	62.7	249485	218824	4	7	24.077
MEGAHIT-QMFCE002AF.8.fa	Rhodoblastus acidophilus	2840074988	Rhodoblastus sp. BP08	Rhodoblastus sp. BP08	SAMN18740532	94.6	0	4	88	324380	4511103	62.96	89282	50591	15	31	16.5522
MEGAHIT-QMFCE002AF.2.fa	Rhodoferax sp. IMCC26218	2840079448	Rhodoferax sp. BP02	Rhodoferax sp. BP02	SAMN18740531	98	0.7	1.3	14	1452120	3368592	63.91	438180	255862	2	5	121.457
MEGAHIT-QMFCE002AF.3.fa	Ramlibacter sp. Leaf400	2840082686	Ramlibacter sp. BP03	Ramlibacter sp. BP03	SAMN18740533	88.5	2	8.8	458	78674	5100867	66.61	17620	9785	84	185	8.67349
MEGAHIT-QMFCE002AF.11.fa	Geothrix fermentans	2840087968	Geothrix sp. BP11	Geothrix sp. BP11	SAMN18740535	44.6	0	52.7	31	411822	2153008	67.86	142693	100179	5	9	29.425
MEGAHIT-QMFCE002AF.7.fa	Betaproteobacteria bacterium	2840090052	Betaproteobacteria bacterium BP07	Betaproteobacteria bacterium BP07	SAMN18740534	95.9	0	3.4	341	75831	3476545	69.85	19525	8542	56	122	47.6517
MEGAHIT-QMFCE002AF.5.fa	Geothrix fermentans	n.a.	n.a.	Geothrix sp. BP05	SAMN18740536	64.8	21.6	31.8	756	337933	3859028	66.57	5814	3247	109	334	40.663
MEGAHIT-QMFCE002AF.12.fa	n.a.	n.a.	n.a.	Rhizobium sp. BP12	SAMN18740537	44.6	2	52	741	25522	3615210	61.4	5970	3780	192	385	6.59126
MEGAHIT-QMFCE002AF.9.fa	Mesorhizobium	n.a.	n.a.	Mesorhizobium sp. BP09	SAMN18740538	29.8	0.7	62.8	1497	20291	4609090	63.47	3321	2297	456	876	5.70609
MEGAHIT-QMFCE002AF.4.fa	n.a.	n.a.	n.a.	Betaproteobacteria bacterium BP04	SAMN18740539	11.5	0	87.8	560	5588	1227863	66.63	2142	1780	215	371	4.71086
